# Supplementary material for: Diterpenoids from the Roots of Salvia yunnanensis
Source: PubMed Central journal article supplement (PMC4681706; doi:10.1007/s13659-015-0080-4), 2015-12-14
Supplement: 13659_2015_80_MOESM1_ESM.pdf [file 13659_2015_80_MOESM1_ESM.pdf]

# Diterpenoids from the Roots of *Salvia yunnanensis*

Fan Xia, Chun-Yan Wu, Xing-Wei Yang, Xian Li, and Gang Xu

## **Supplementary material**

### **Table of Contents**

- Figures S1–S15: The original NMR and MS spectra of the new compounds.

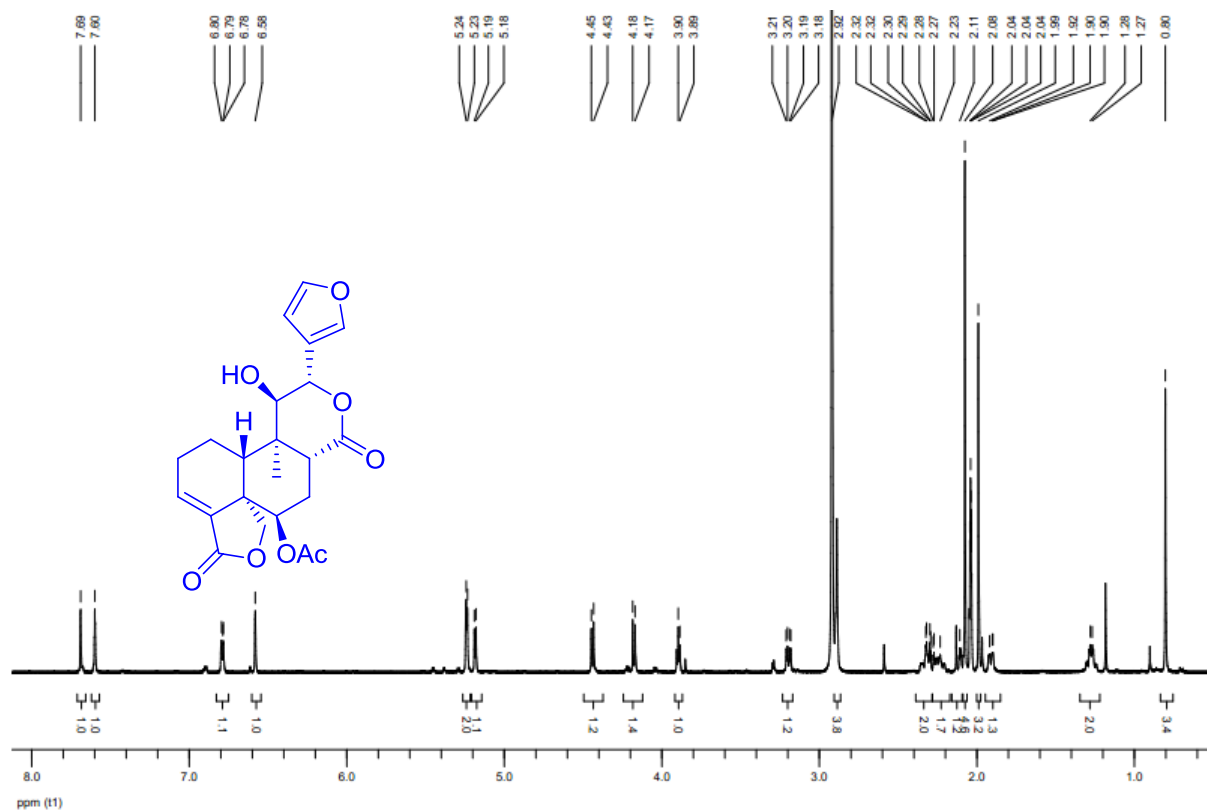

**Figure S1.**  $^1\text{H}$  (in acetone- $d_6$ ) spectrum of salyunnanin I (**1**).

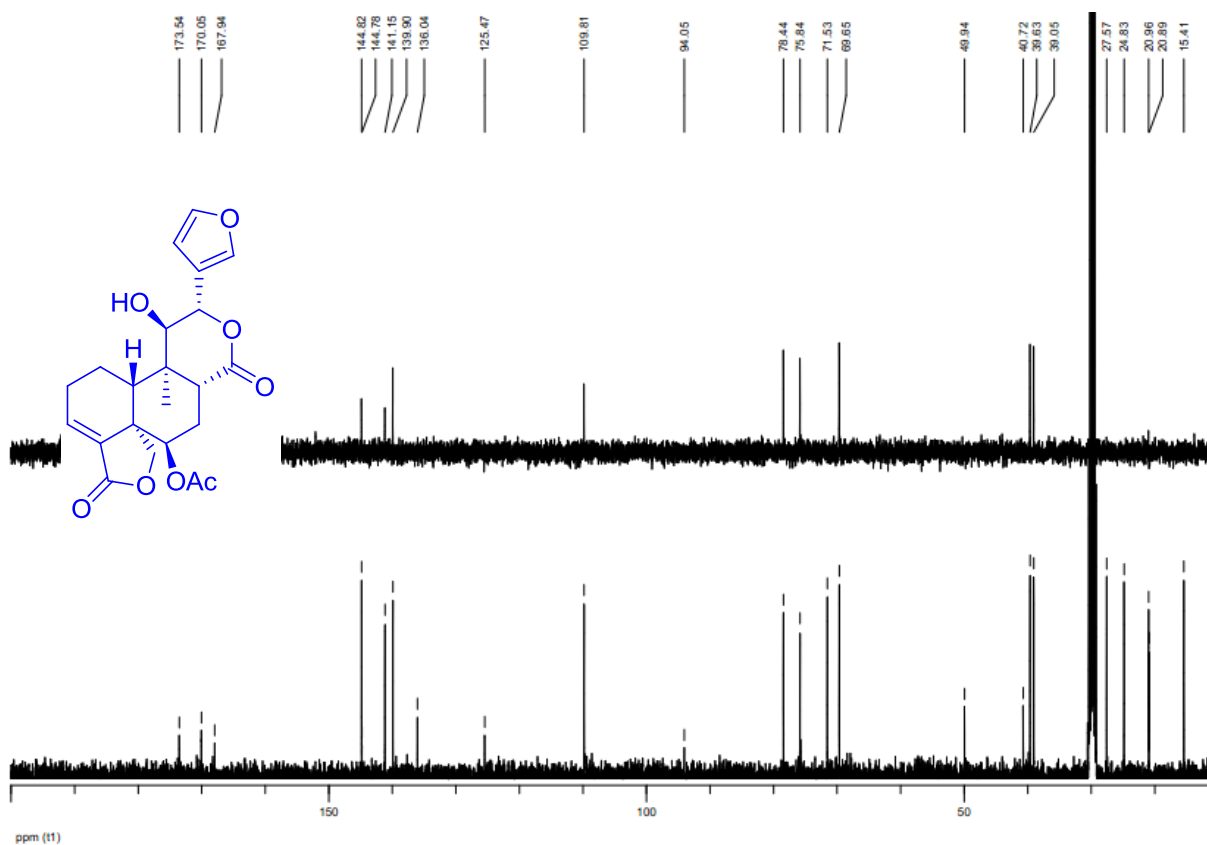

**Figure S2.**  $^{13}\text{C}$  and DEPT (in acetone- $d_6$ ) spectra of salyunnanin I (**1**).

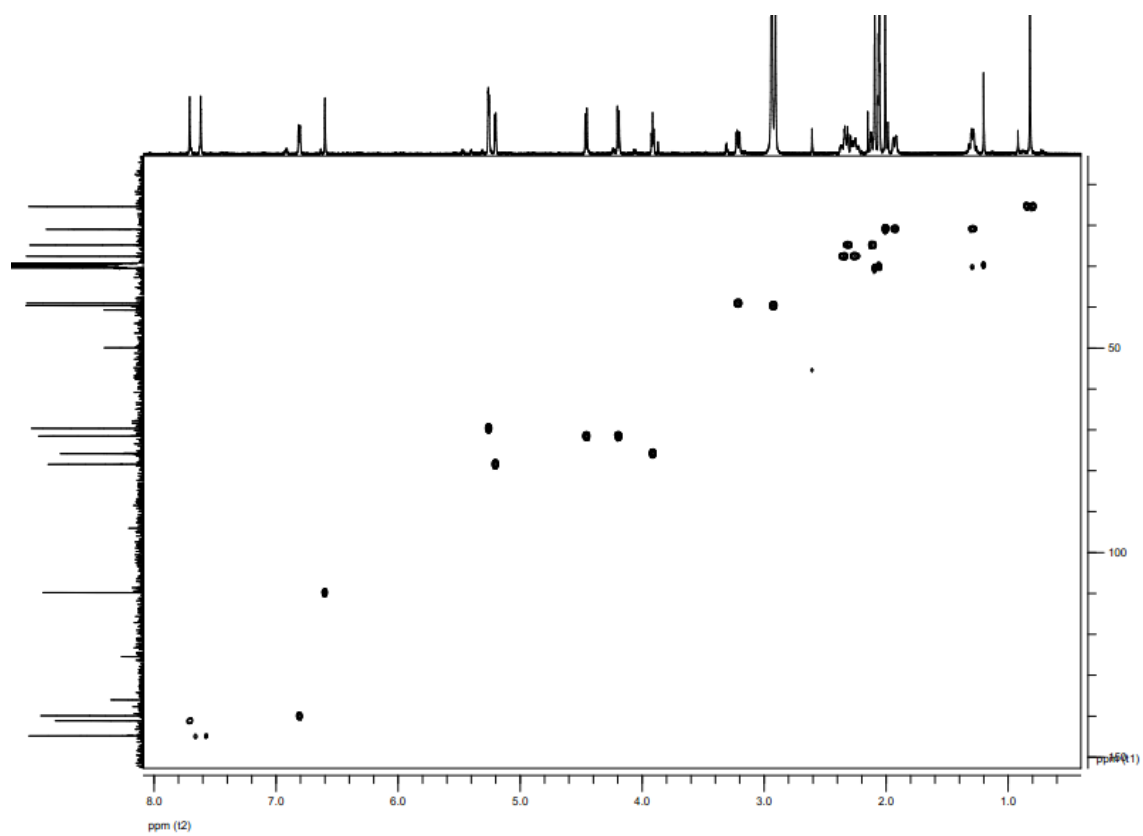

**Figure S3.** HSQC spectrum of salyunnanin I (**1**).

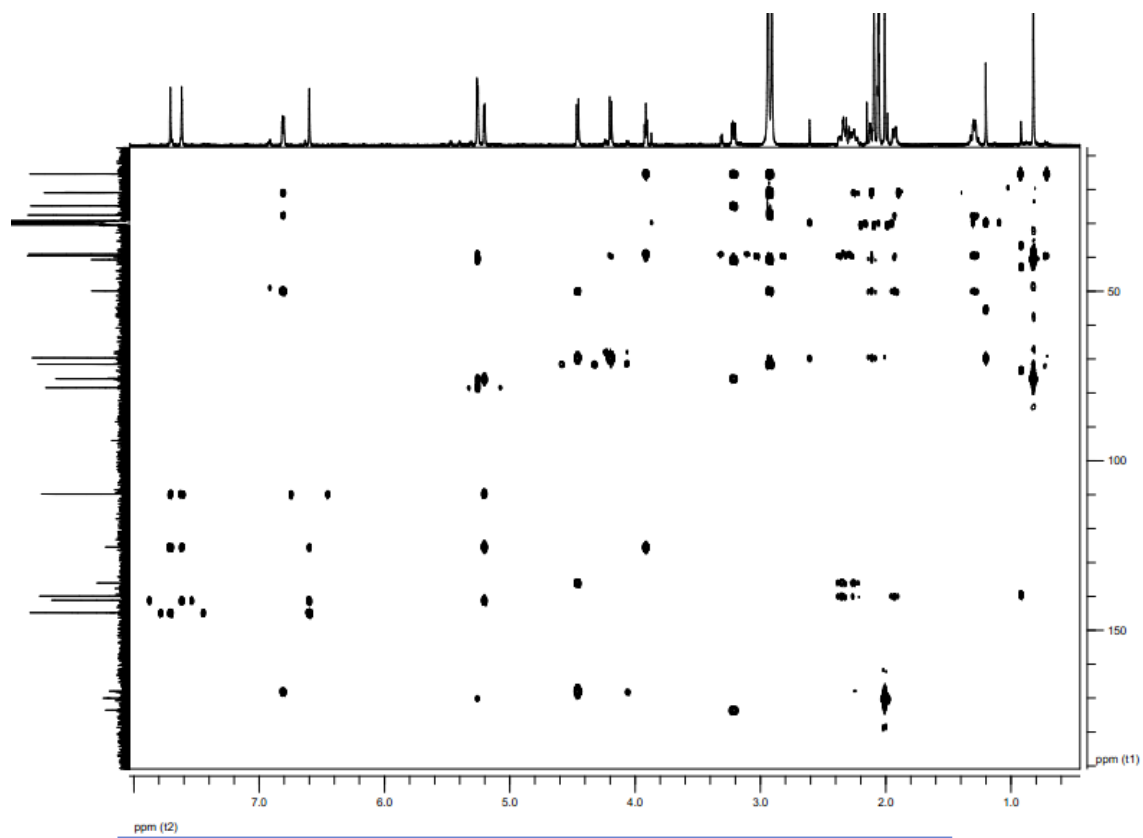

**Figure S4.** HMBC spectrum of salyunnanin I (**1**).

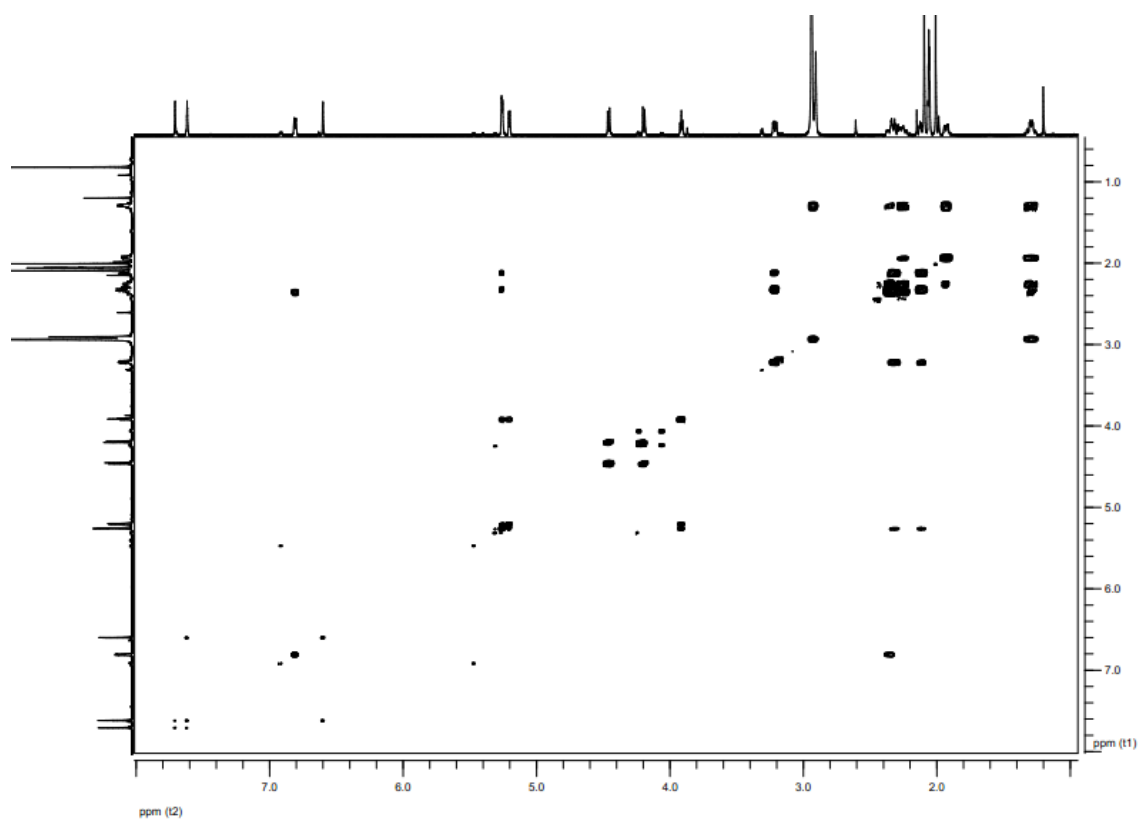

**Figure S5.** <sup>1</sup>H–<sup>1</sup>H COSY spectrum of salyunnanin I (**1**).

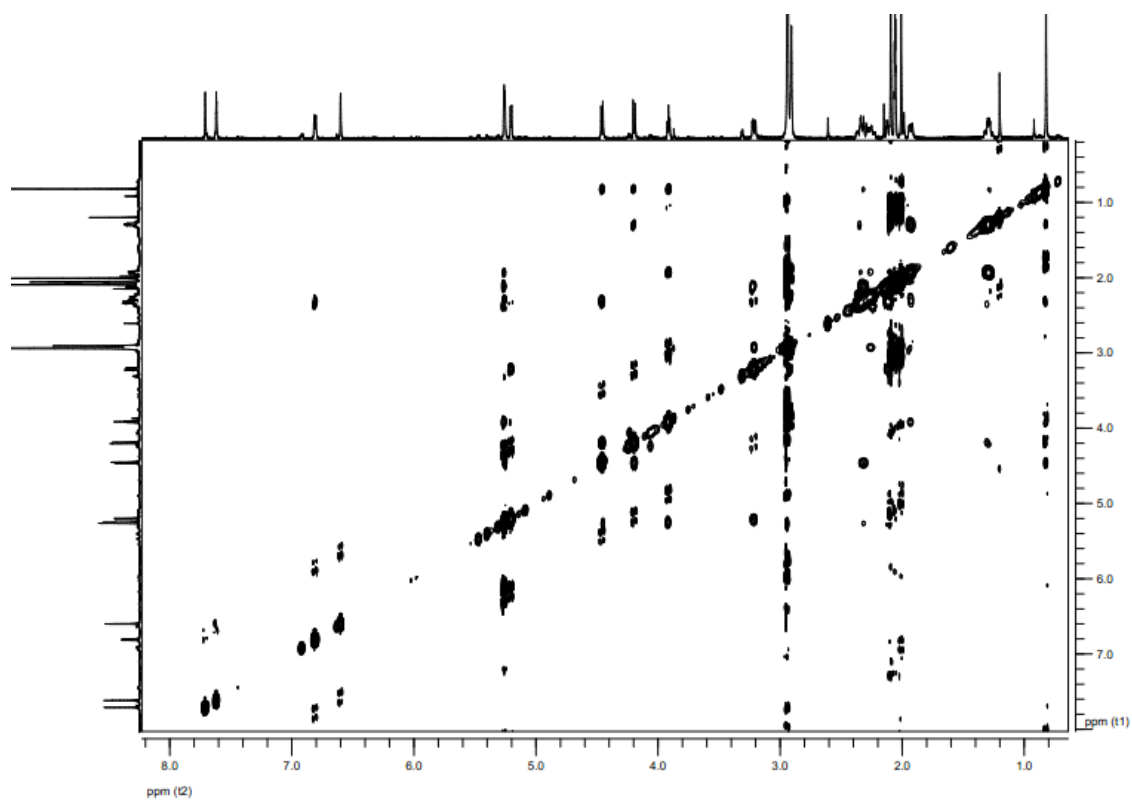

**Figure S6.** NOESY spectrum of salyunnanin I (**1**).

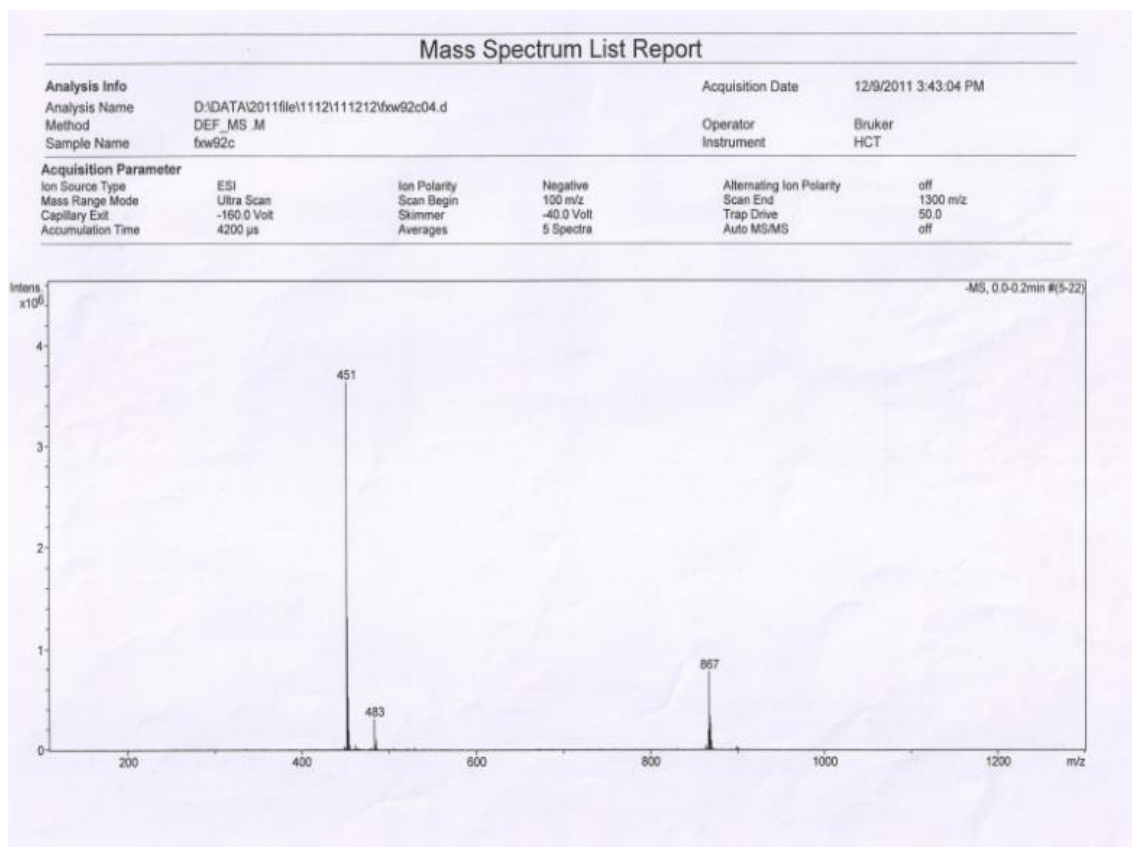

**Figure S7.** ESIMS spectrum of salyunnanin I (**1**).

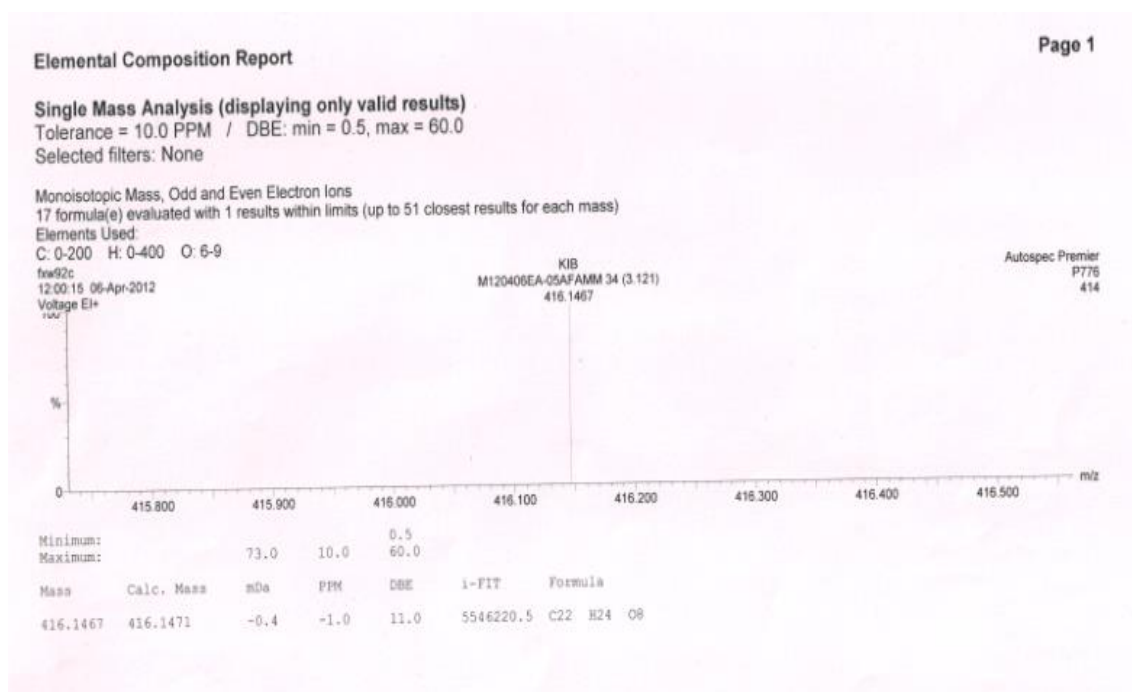

**Figure S8.** HR-EIMS spectrum of salyunnanin I (**1**).

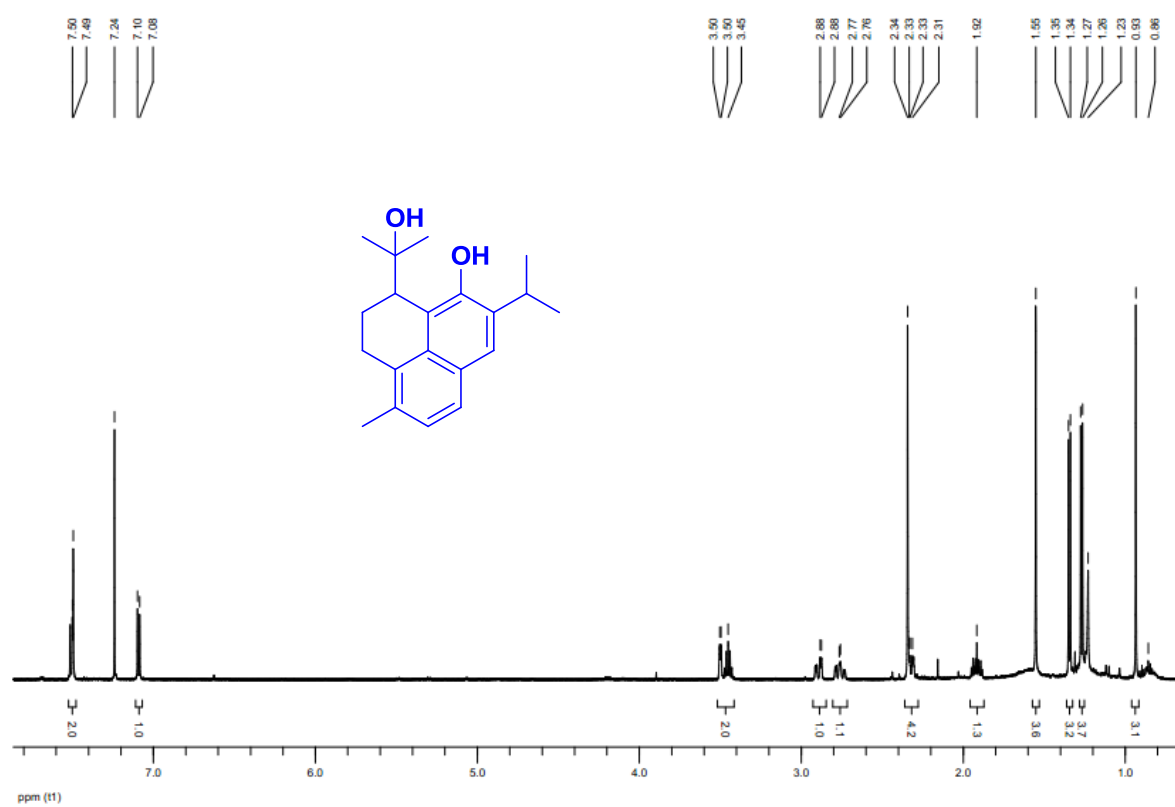

**Figure S9.**  $^1\text{H}$  (in  $\text{CDCl}_3$ ) spectrum of salyunnanin J (**2**).

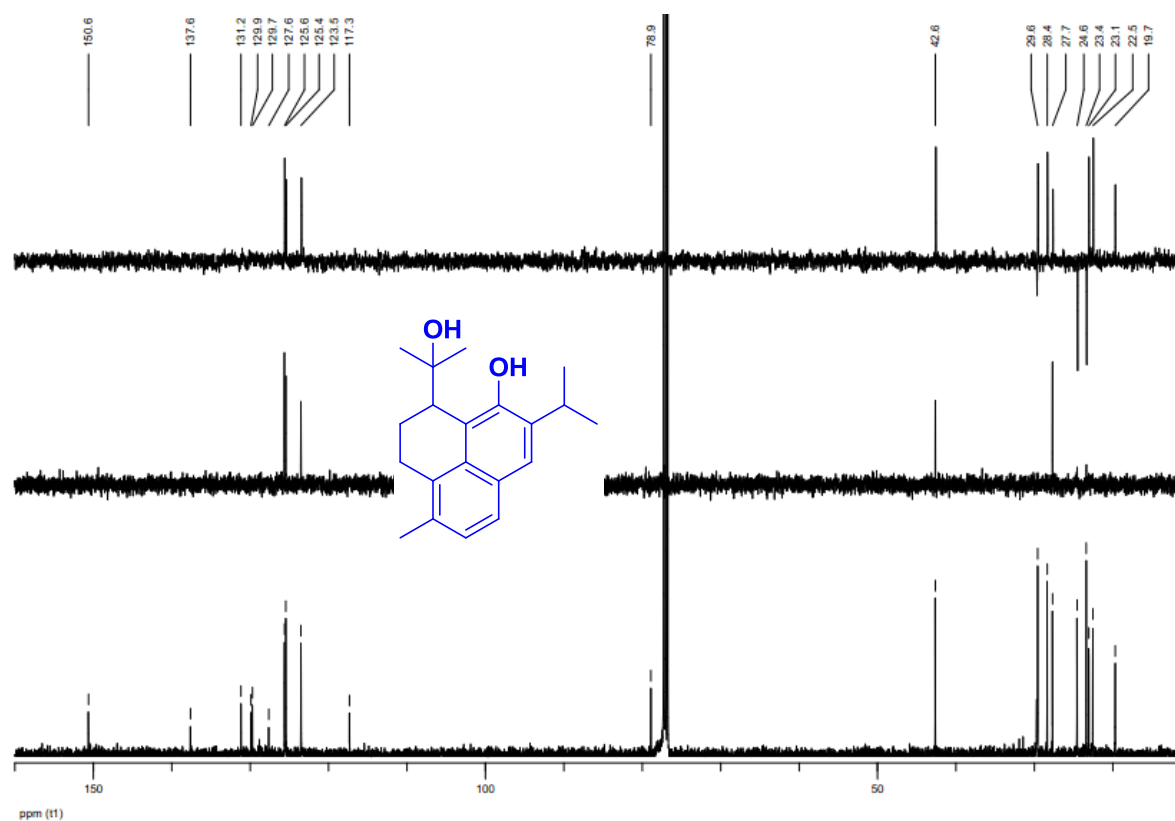

**Figure S10.**  $^{13}\text{C}$  and DEPT (in  $\text{CDCl}_3$ ) spectra of salyunnanin J (**2**).

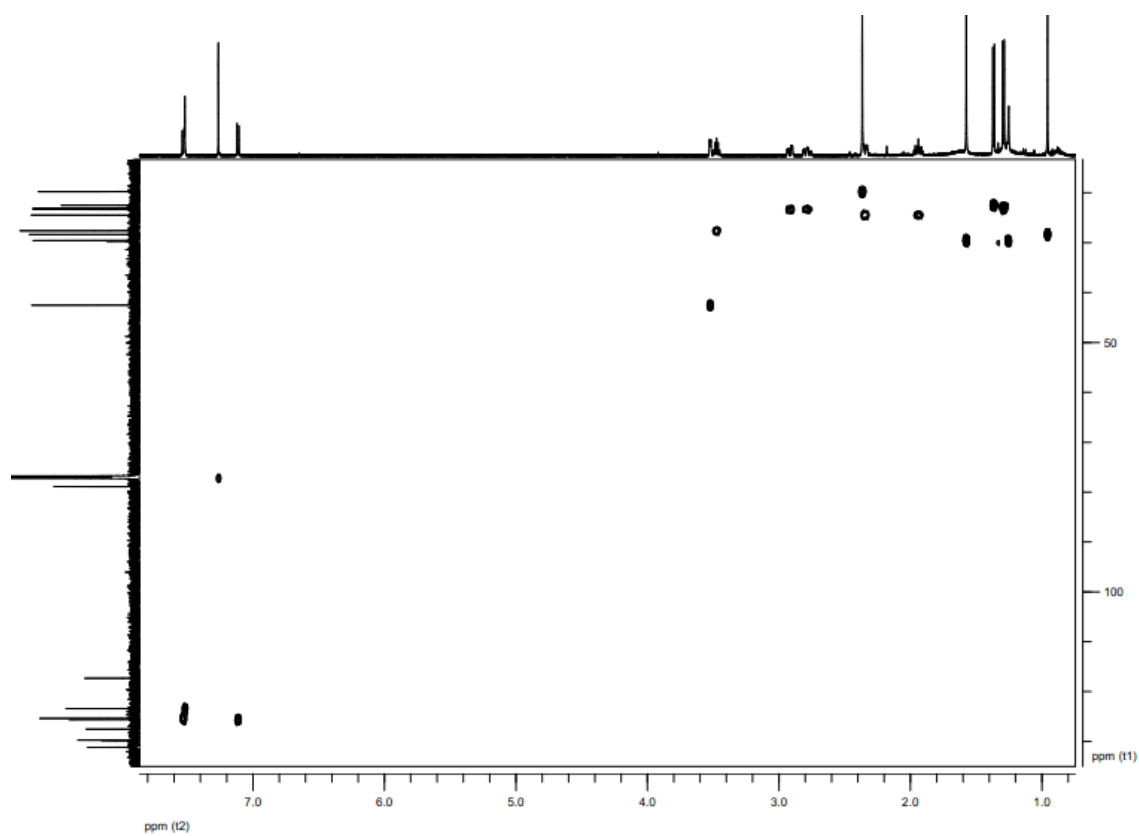

**Figure S11.** HSQC spectrum of salyunnanin J (2).

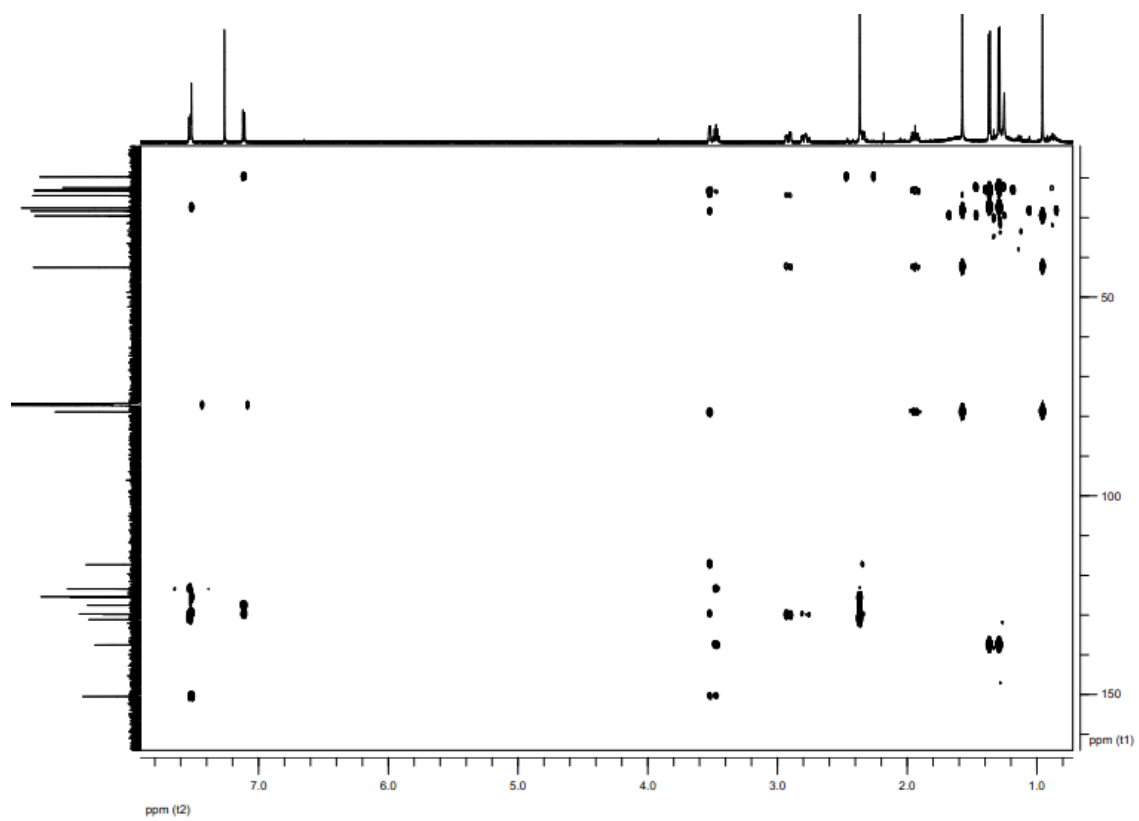

**Figure S12.** HMBC spectrum of salyunnanin J (2).

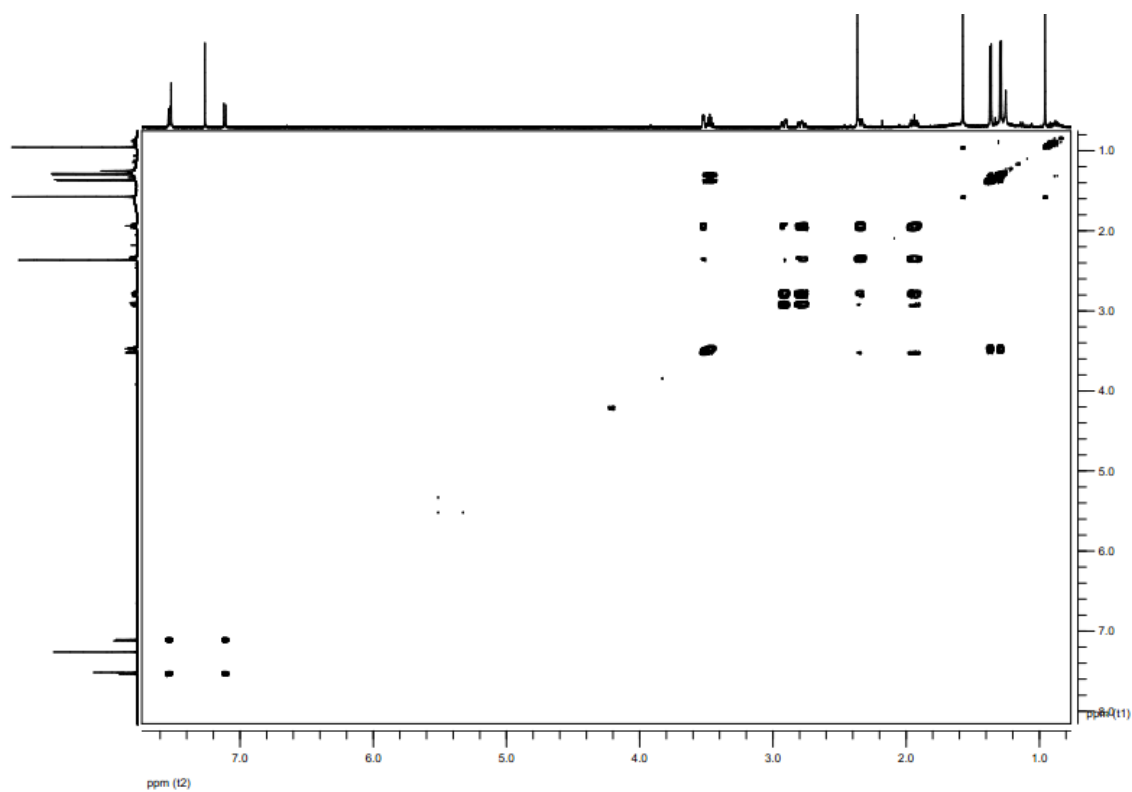

Figure S13.  $^1\text{H}$ - $^1\text{H}$  COSY spectrum of salyunnanin J (2).

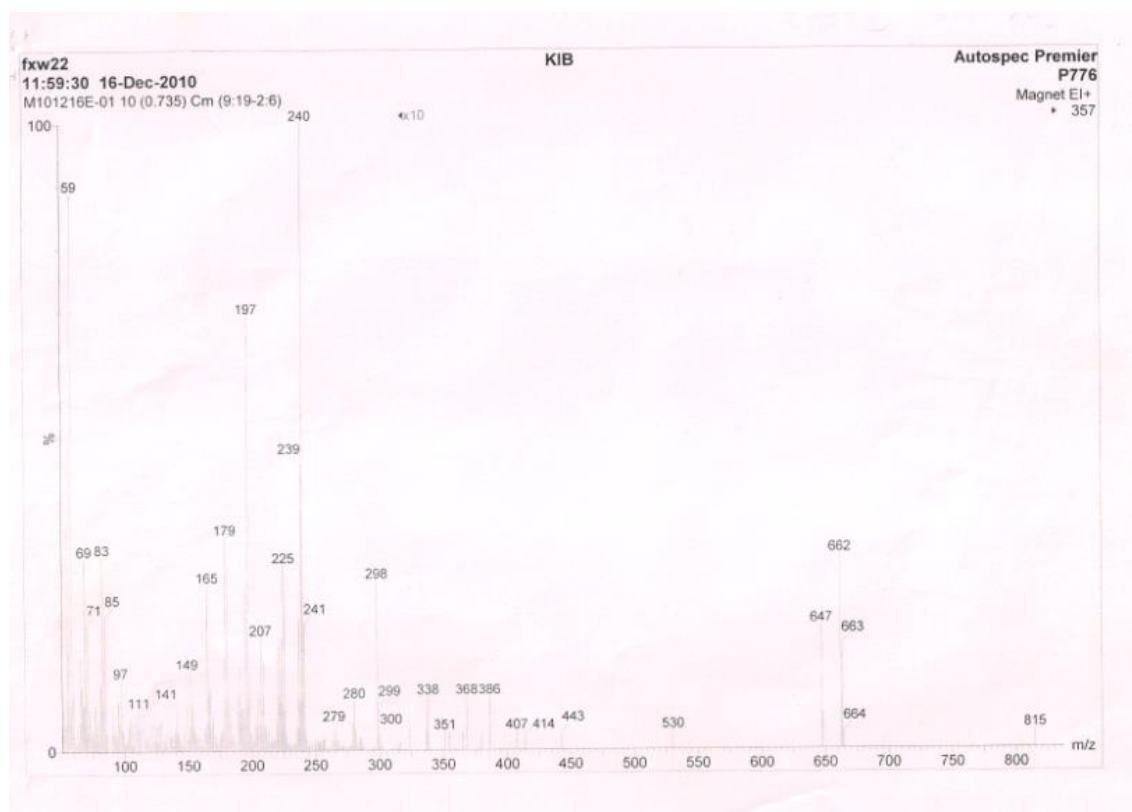

Figure S14. EIMS spectrum of salyunnanin J (2).



Acq. Date: Wednesday, February 08, 2012

Acq. Time: 13:31

Sample Name: 120207ESIA fxw22

### Elemental composition calculator

Target m/z: +321.1835 amu  
 Tolerance: +10.0000 ppm  
 Result type: Elemental  
 Max num of results: 1000  
 Min DBE: -10.0000 Max DBE: +60.0000  
 Electron state: OddAndEven  
 Num of charges: 0  
 Add water: N/A  
 Add proton: N/A  
 File Name: 120207ESIA fxw22.wiff

|    | Elements | Min Number | Max Number |
|----|----------|------------|------------|
| 1  | 2H       | 0          | 0          |
| 2  | Br       | 0          | 0          |
| 3  | C        | 0          | 200        |
| 4  | Cl       | 0          | 0          |
| 5  | F        | 0          | 0          |
| 6  | H        | 0          | 400        |
| 7  | I        | 0          | 0          |
| 8  | K        | 0          | 0          |
| 9  | N        | 0          | 0          |
| 10 | Na       | 1          | 1          |

Acq. Date: Wednesday, February 08, 2012

Acq. Time: 13:31

Sample Name: 120207ESIA fxw22

|    | Elements | Min Number | Max Number |
|----|----------|------------|------------|
| 11 | O        | 0          | 4          |
| 12 | P        | 0          | 0          |
| 13 | Pt       | 0          | 0          |
| 14 | S        | 0          | 0          |
| 15 | Si       | 0          | 0          |

|   | Formula       | Calculated m/z (amu) | mDa Error | PPM Error | DBE |
|---|---------------|----------------------|-----------|-----------|-----|
| 1 | C20 H26 O2 Na | 321.1830             | 0.4499    | 1.4010    | 7.5 |

**Figure S15.** HR-ESIMS spectrum of salyunnanin J (2).
